# Supplementary material for: Deep Insights Into the Plastome Evolution and Phylogenetic Relationships of the Tribe Urticeae (Family Urticaceae)
Source: PubMed Central journal article supplement (PMC9164014; doi:10.3389/fpls.2022.870949), 2022-05-20

# Supplementary Figure 2

**A**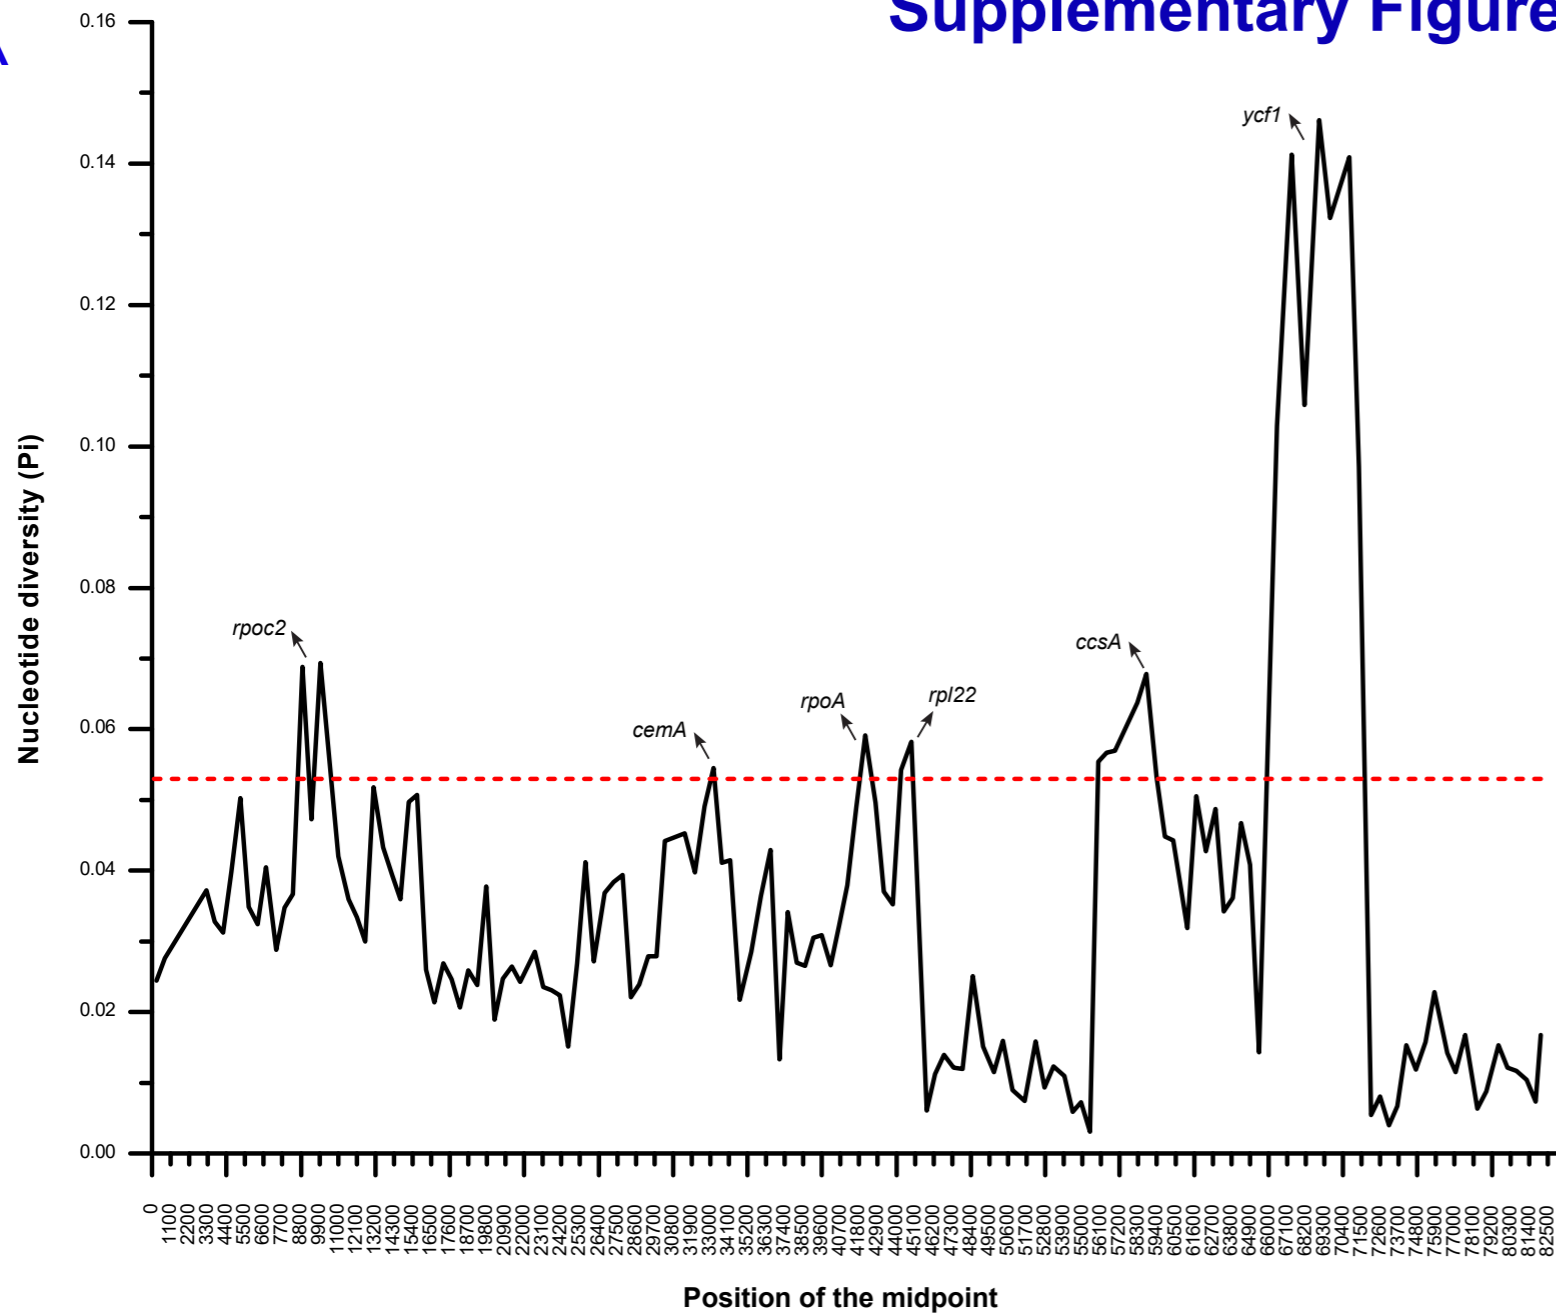**B**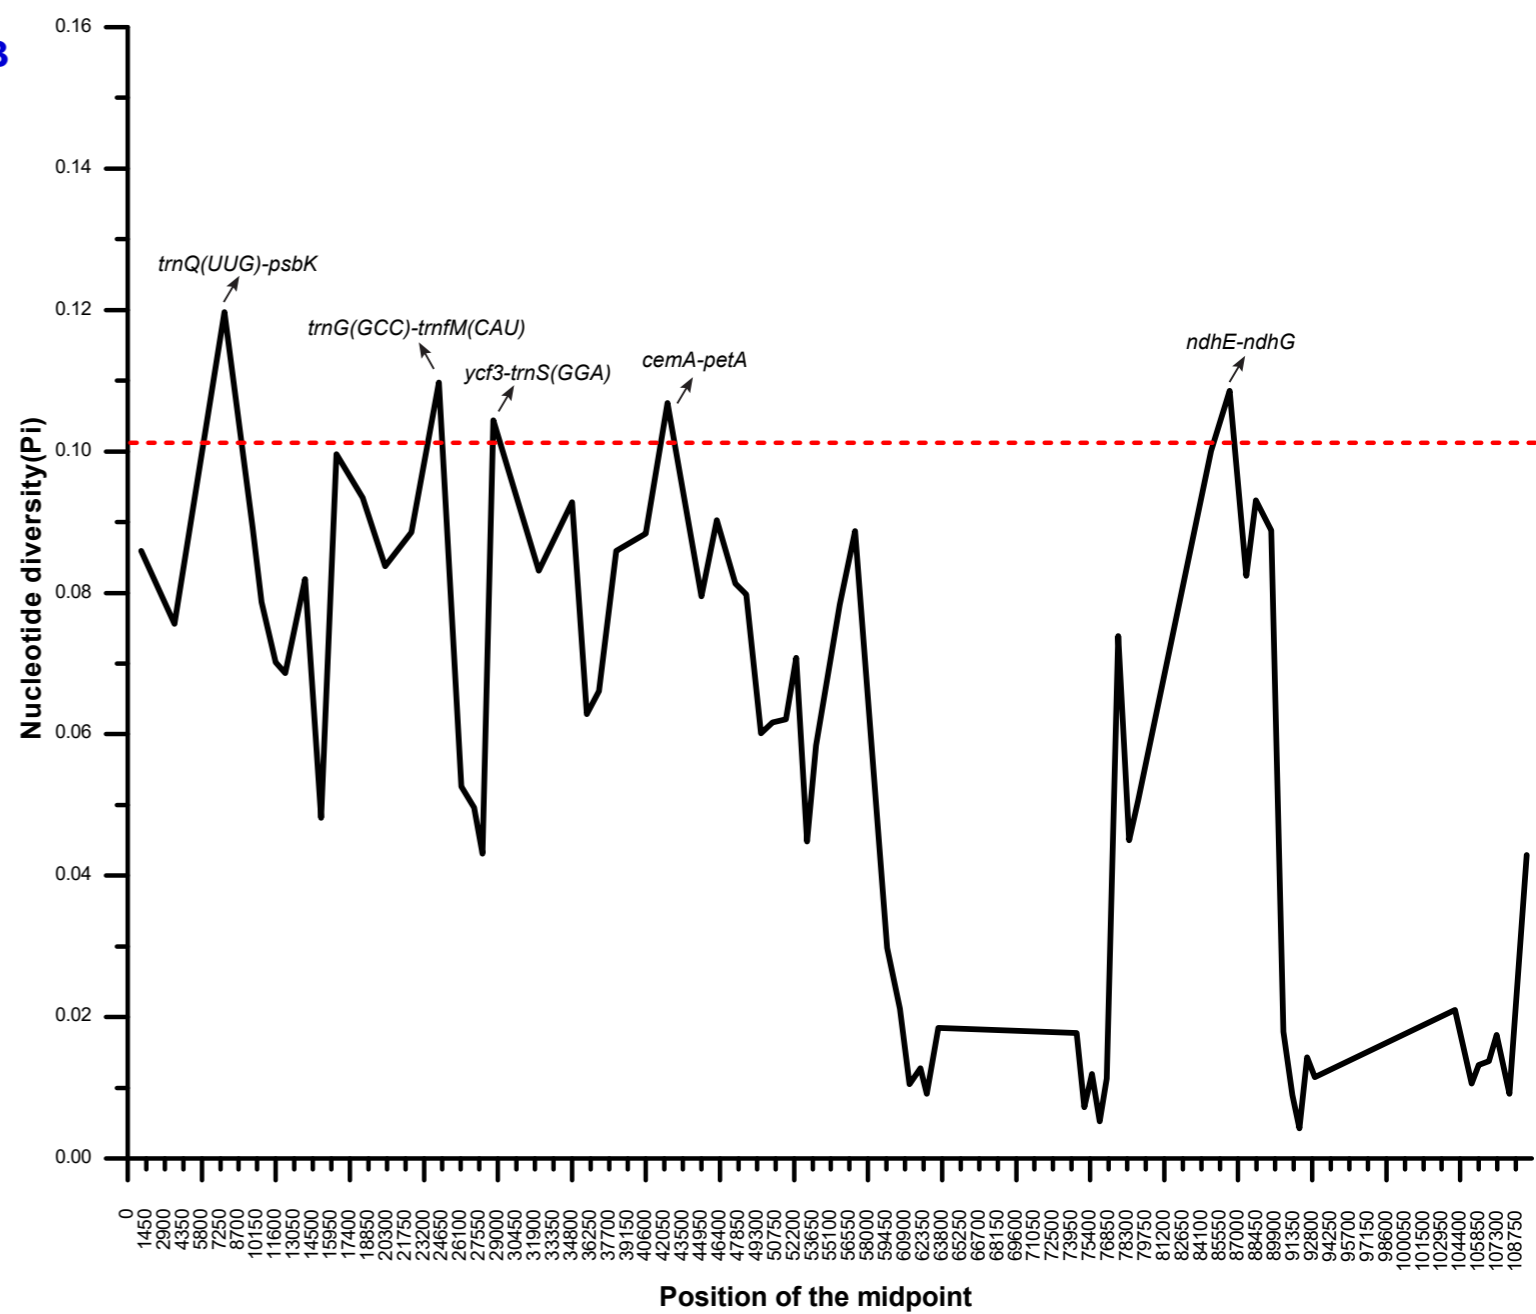

C

## ycf1 gene tree

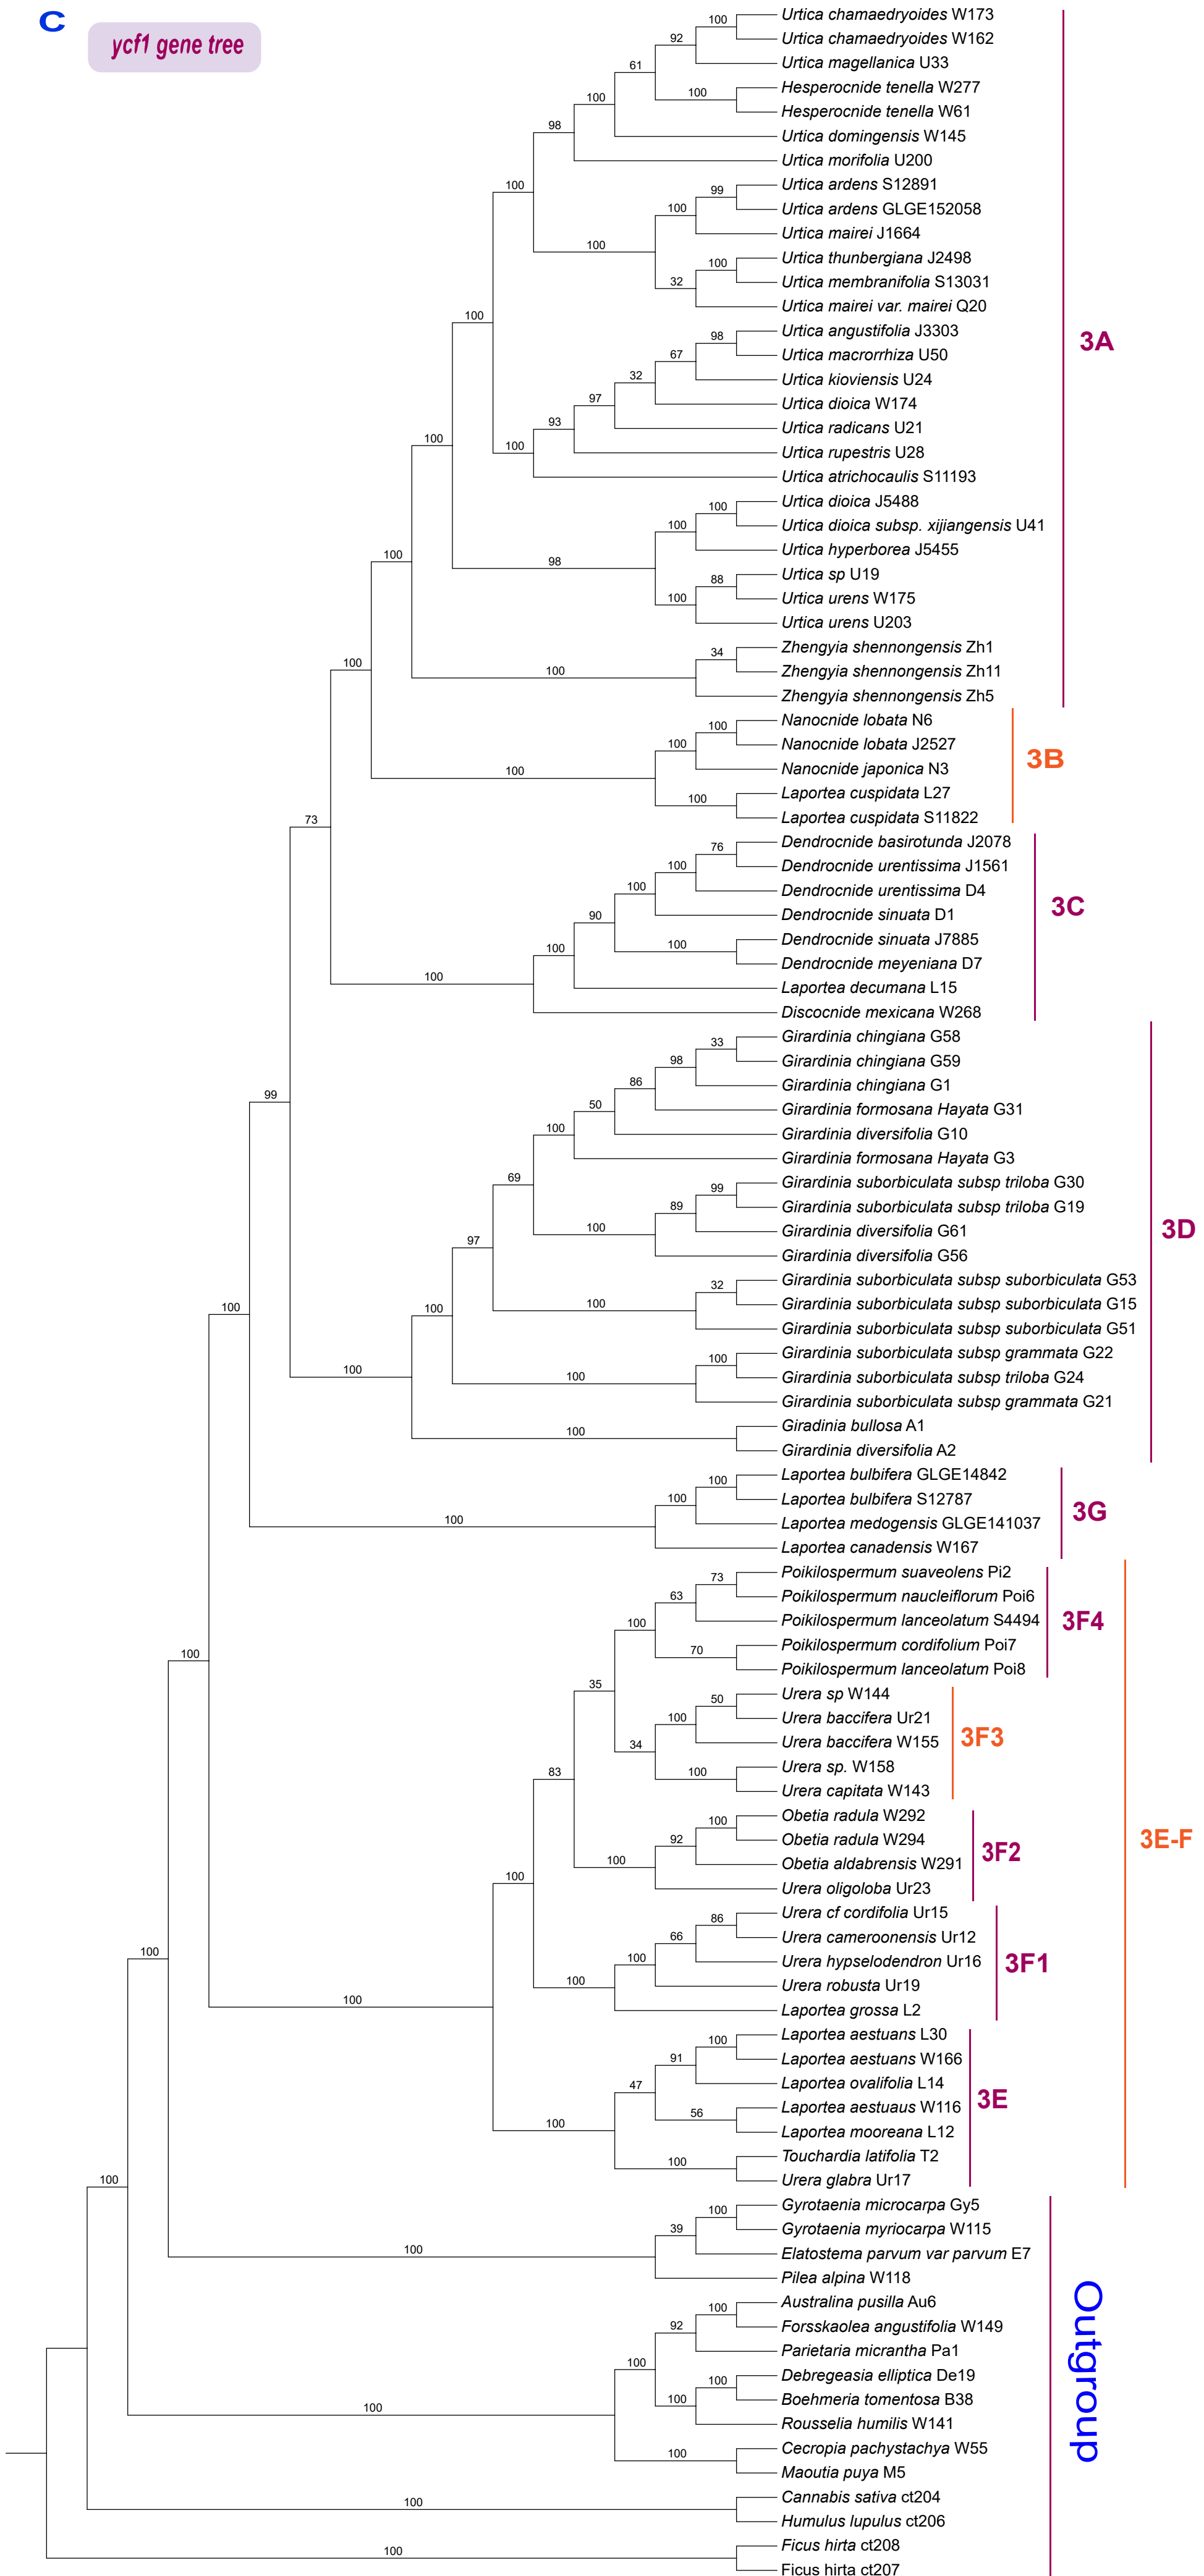

Supplement: Data_Sheet_2.pdf [file Data_Sheet_2.pdf]
