# Supplementary material for: Deep Insights Into the Plastome Evolution and Phylogenetic Relationships of the Tribe Urticeae (Family Urticaceae)
Source: PubMed Central journal article supplement (PMC9164014; doi:10.3389/fpls.2022.870949), 2022-05-20
Supplement: Data_Sheet_3.pdf [file Data_Sheet_3.pdf]

# Supplementary Figure 3A: CDS

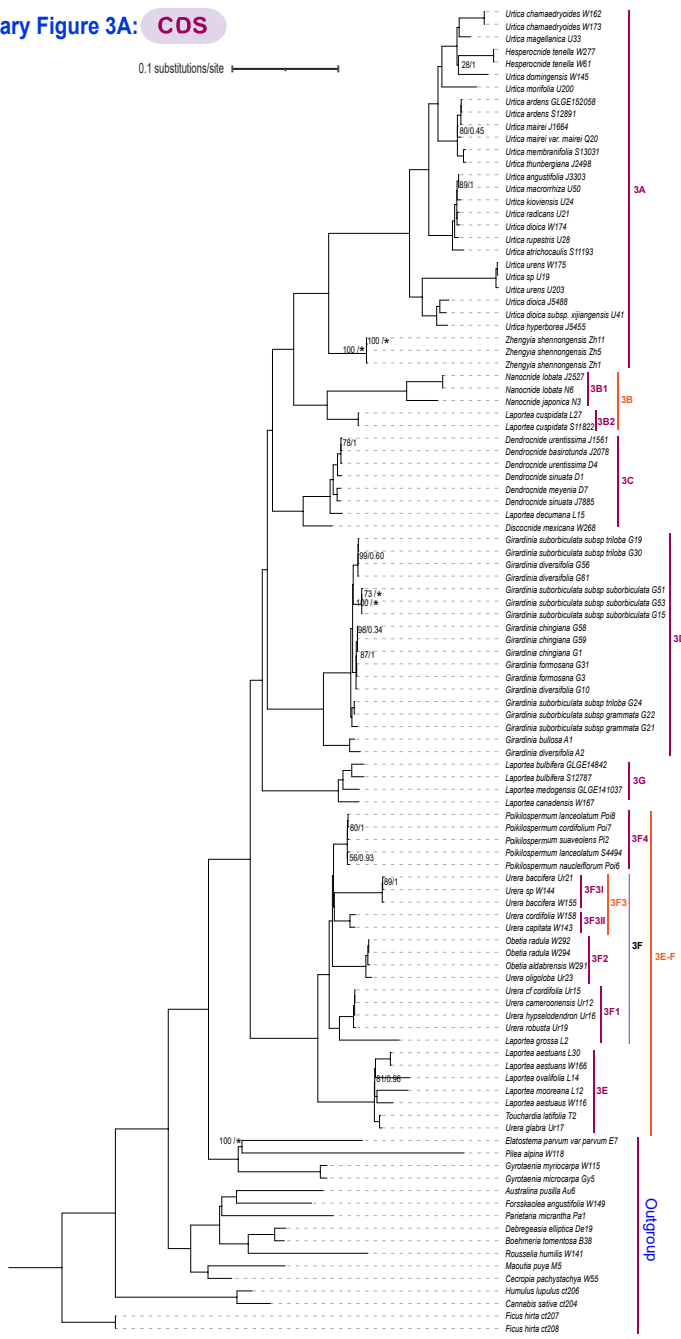



0.01 substitutions/site

0.1 substitutions/site

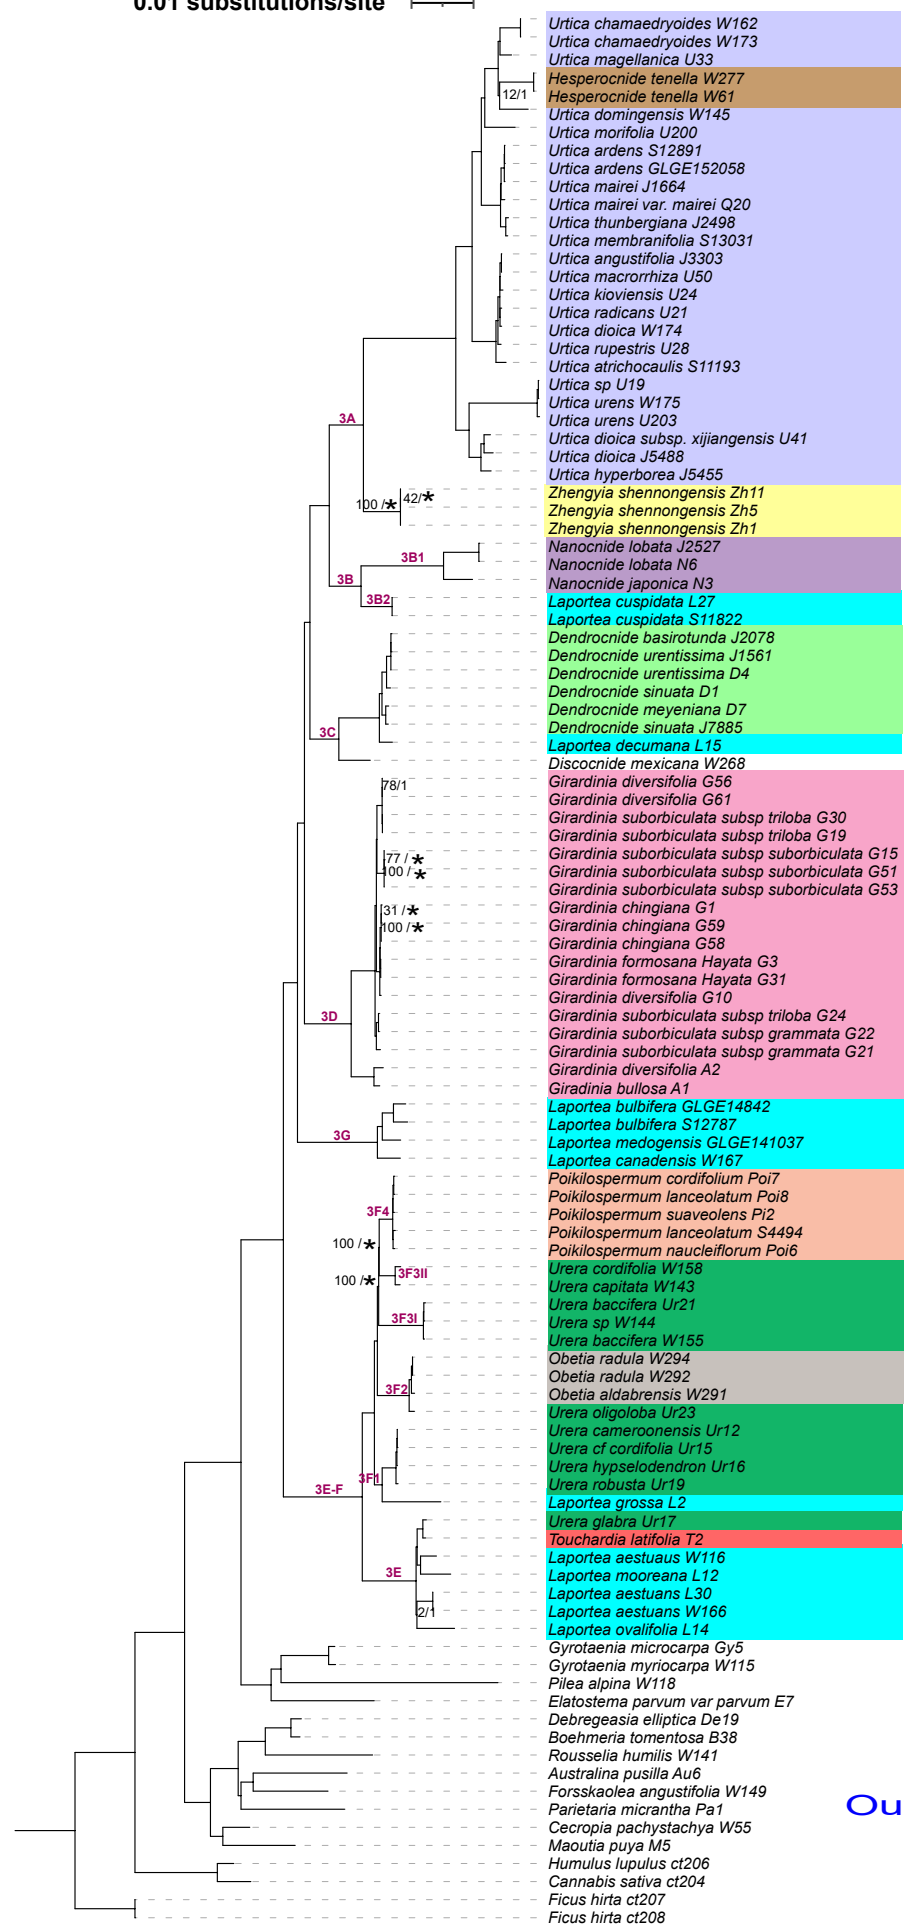

Outgroups

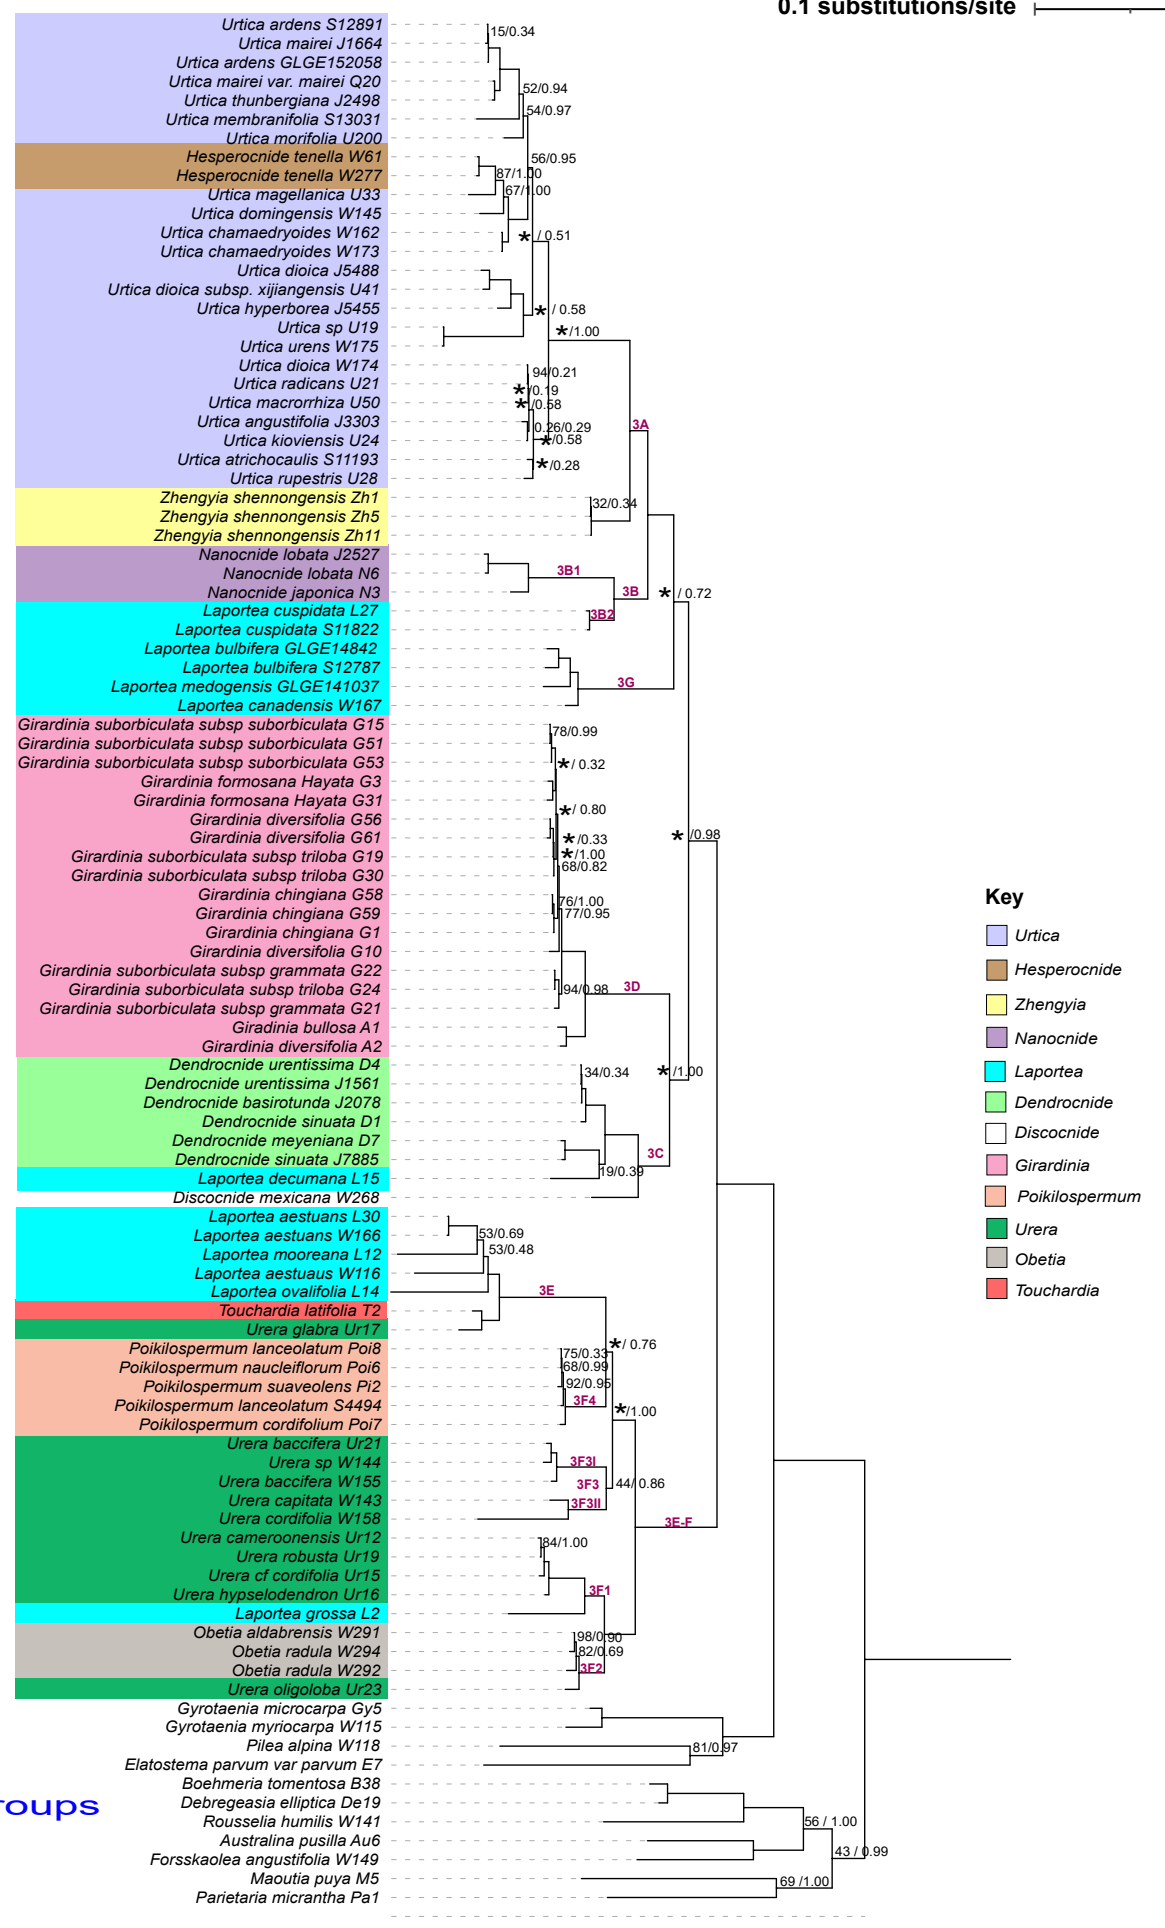

Key

- Urtica
- Hesperocnide
- Zhengyia
- Nanocnide
- Laportea
- Dendrocnide
- Discocnide
- Girardinia
- Poikilospermum
- Urera
- Obetia
- Touchardia
